# Supplementary material for: Diphyllin Shows a Broad-Spectrum Antiviral Activity against Multiple Medically Important Enveloped RNA and DNA Viruses
Source: MDPI journal article supplement (doi:10.3390/v14020354), 2022-02-09
Supplement: s1 [file s1]

Article

# Diphyllin shows a broad-spectrum antiviral activity against multiple medically important enveloped RNA and DNA viruses

Michal Štefánik<sup>1,2</sup>, Dattatry Shivajirao Bhosale<sup>1,3</sup>, Jan Havierník<sup>1,4</sup>, Petra Straková<sup>1,4</sup>, Martina Fojtíková<sup>1</sup>, Lucie Dufková<sup>1</sup>, Ivana Huvarová<sup>1</sup>, Jiří Salát<sup>1</sup>, Jan Bartáček<sup>3</sup>, Jan Svoboda<sup>3</sup>, Miloš Sedlák<sup>3</sup>, Daniel Růžek<sup>1,4,5</sup>, Andrew D. Miller<sup>1,2,6\*</sup>, and Luděk Eyer<sup>1,4\*</sup>

<sup>1</sup> Veterinary Research Institute, Emerging Viral Diseases, Hudcova 296/70, CZ-621 00 Brno, Czech Republic; stefanik@vri.cz (M.S.); bhosale@vri.cz (D.S.B.); haviernik@vri.cz (J.H.); strakova.petra@vri.cz (P.S.); fojtikova@vri.cz (M.F.); dufkova@vri.cz (L.D.); huvarova@vri.cz (I.H.); salat@vri.cz (J.S.); miller@vri.cz (A.D.M.); eyer@vri.cz (L.E.).

<sup>2</sup> Department of Chemistry and Biochemistry, Mendel University in Brno, CZ-61300 Brno, Czech Republic

<sup>3</sup> Institute of Organic Chemistry and Technology, Faculty of Chemical Technology, University of Pardubice, Studentská 573, CZ-532 10 Pardubice, Czech Republic; jan.bartacek@upce.cz (J.B.); jan.svoboda@upce.cz (J.Sv.); milos.sedlak@upce.cz (M.Se.).

<sup>4</sup> Institute of Parasitology, Biology Centre of the Czech Academy of Sciences, Branišovská 1160/31, CZ-370 05 České Budějovice, Czech Republic; ruzekd@paru.cas.cz (D.R.).

<sup>5</sup> Department of Experimental Biology, Faculty of Science, Masaryk University, CZ-62500 Brno, Czech Republic.

<sup>6</sup> KP Therapeutics (Europe) s.r.o., CZ-61200 Brno, Czech Republic

\* Correspondence: eyer@vri.cz (L.E.) and miller@vri.cz (A.D.M.).

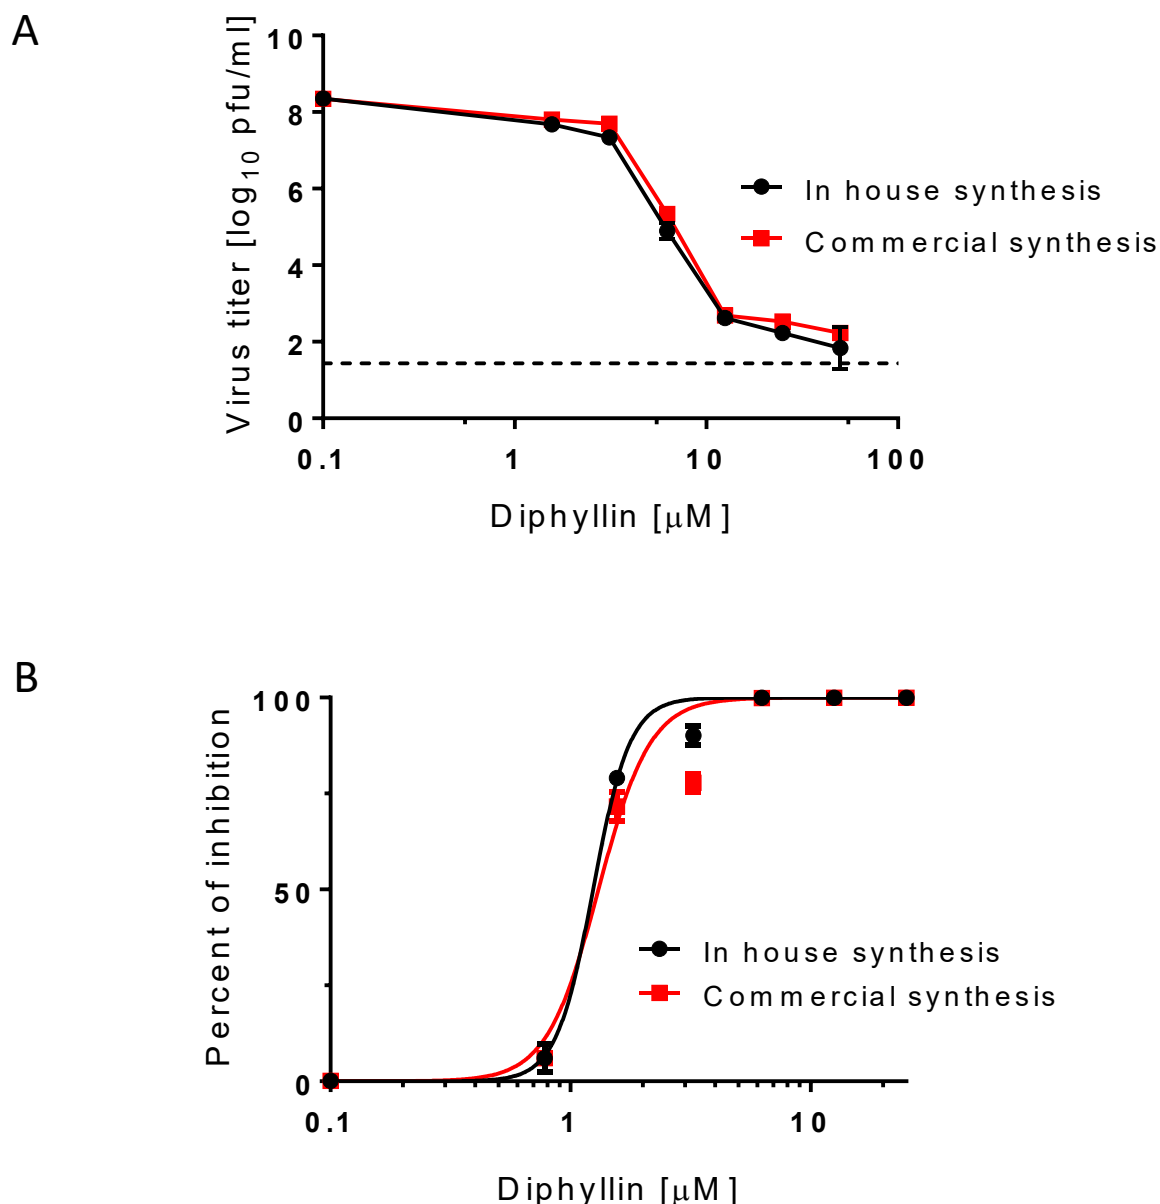

**Figure S1.** Functional comparison between our synthetic diphyllin **1** and the commercial product was carried out using an anti-TBEV antiviral assay based on PS cells. **(A)** Growth curves for TBEV (strain Hypr) cultivated in the presence of diphyllin **1**. Vero cell monolayers were treated with the in house synthesized diphyllin **1** or the commercially synthesized compound (0 to 50  $\mu\text{M}$ ) and infected simultaneously with TBEV (MOI of 0.1). The infected cells were cultivated for 48 h at 37 °C in 5 % CO<sub>2</sub>, after which cell media were collected, and viral titers determined using a plaque assay and expressed as PFU/ml. **(B)** Inhibitory curves for the in house synthesized diphyllin **1** or the commercially synthesized compound (0 to 50  $\mu\text{M}$ ) constructed from the viral titers obtained in (A) and used for the calculation of EC<sub>50</sub> values. The mean titers/percent inhibition from three biological replicates of two independent experiments are shown, and error bars indicate standard errors of the mean (n = 3). The horizontal dashed line indicates the minimum detectable threshold of 1.44  $\log_{10}$  PFU/ml.
